# Supplementary material
Source: PubMed Central journal article supplement (PMC3265897)
Supplement: supp_M111.323022_jbc.M111.323022-1.pdf [file supp_M111.323022_jbc.M111.323022-1.pdf]

*SUPPLEMENTAL DATA FOR THE MANUSCRIPT*

Inhibition of Phosphorylation of Na<sup>+</sup>,K<sup>+</sup>-ATPase by Mutations Causing Familial Hemiplegic  
Migraine

by

Vivien Rodacker Schack, Rikke Holm, and Bente Vilsen

TABLE S1

Distance between Na<sup>+</sup>,K<sup>+</sup>-ATPase residues E700 and K724, or the corresponding E689 and K713 residues in the Ca<sup>2+</sup>-ATPase, in various crystal structures (Protein Data Bank codes indicated in parentheses).

| <b>E2 states Na,K-ATPase</b>        | <b>E700–K724 (Å)</b>          |
|-------------------------------------|-------------------------------|
| Na,K-ATPase, E2-MgF-K (2ZXE)        | 4.63                          |
| Na,K-ATPase, E2-MgF-Rb (3B8E)       | 5.22                          |
|                                     |                               |
| <b>E2 states Ca-ATPase</b>          | <b>E689–K713</b>              |
| Ca-ATPase, E2-MgF-ADP-Tg (1WPG)     | 5.21, 4.64*                   |
| Ca-ATPase, E2-AIF-Tg (2ZBG)         | 4.55                          |
| Ca-ATPase, E2-AIF-Tg (1XP5)         | 3.19                          |
| Ca-ATPase, E2-AIF-Tg-TNPAMP (3AR8)  | 5.10                          |
| Ca-ATPase, E2-AIF-AMPPCP (3B9R)     | 3.36, 3.56*                   |
| Ca-ATPase, E2-AIF (3N5K)            | 3.43, 4.37*                   |
| Ca-ATPase, E2-Tg-ADP (3AR3)         | 5.59                          |
| Ca-ATPase, E2-Tg-ATP (3AR4)         | 3.95                          |
| Ca-ATPase, E2-Tg-TNPAMP (3AR5)      | 3.42                          |
| Ca-ATPase, E2-Tg-TNPADP (3AR6)      | 3.21                          |
| Ca-ATPase, E2-Tg-TNPATP (3AR7)      | 4.25                          |
| Ca-ATPase, E2-BeF-Tg-TNPAMP (3AR9)  | 5.35                          |
| Ca-ATPase, E2-BeF-Tg (2ZBF)         | 5.39                          |
| Ca-ATPase, E2-Tg-AMPPCP (2DQS)      | 5.19                          |
| Ca-ATPase, E2-BeF (3B9B)            | 3.54                          |
| Ca-ATPase, E2-Tg (1IWO)             | 2.68 (2 <sup>nd</sup> O 3.19) |
| Ca-ATPase, E2-MgF-CPA-AMPPCP (3FGO) | 3.61, 4.15*                   |
|                                     |                               |
| <b>E1 states Ca-ATPase</b>          |                               |
| Ca-ATPase, E1-Ca (1SU4)             | 3.67                          |
| Ca-ATPase, E1-Ca-AMPPCP (1VFP)      | 3.56                          |
| Ca-ATPase, E1-Ca-AMPPCP (3AR2)      | 5.14                          |
| Ca-ATPase, E1-Ca-AMPPCP (1T5S)      | 3.53                          |
| Ca-ATPase, E1-Ca-AMPPCP (3N8G)      | 4.05                          |
| Ca-ATPase, E1-Ca-AIF-ADP (2ZBD)     | 4.94                          |
| Ca-ATPase, E1-Ca-AIF-ADP (1T5T)     | 3.19                          |
| Ca-ATPase, E1P-Ca-AMPPN (3BA6)      | 4.42                          |

\*indicates that the asymmetric unit of the crystal lattice consists of 2 or 4 molecules with two different distances as indicated.
